# Supplementary material for: Strategies to target SARS-CoV-2 entry and infection using dual mechanisms of inhibition by acidification inhibitors
Source: PubMed Central journal article supplement (PMC8297935; doi:10.1371/journal.ppat.1009706), 2021-07-12
Supplement: ppat.1009706.s013.pdf [file ppat.1009706.s013.pdf]

1 **Strategies to target SARS-CoV-2 entry and infection using dual mechanisms of inhibition by**  
2 **acidification inhibitors**

3 **S1 Text: Supporting Methods**

4 *Cell lines, constructs, and antibodies:*

5 Cell lines: AGS cells (Human adeno gastric carcinoma cells stably expressing human Folate Receptor)  
6 were maintained in HF12 media (HiMEDIA, India). HEK-293T, LentiX-293T, A549 and A549-ACE2  
7 (BEI Resources, Cat# NR-53522) cells were maintained in DMEM-High Glucose (HiMEDIA, India).  
8 All culture media were supplemented with 10% FBS (16000044, Invitrogen), NaHCO<sub>3</sub> and L-  
9 Glutamine/ Penicillin/ Streptomycin solution (G1146, Sigma Aldrich). For AGS cells, the antibiotic  
10 hygromycin B (10687010, Invitrogen) was added at a concentration of 200µg/ml for selection during  
11 maintenance of cultures and the antibiotic-free medium was used for assays. AGS cells stably  
12 expressing ACE2 was prepared by transducing AGS cells with lentiviral particles made from second  
13 generation packaging system. These cells were maintained with 20µg/ml of puromycin (Sigma P8833)  
14 and hygromycin B. For assays with AGS-ACE2, puromycin containing media was used. A549-ACE2  
15 were maintained with 2 µg/ml of puromycin. Vero cells (African green Monkey kidney cell line) were  
16 maintained in DMEM-High Glucose (Thermo Fischer, 11995065) supplemented with 10% heat  
17 inactivated FBS (16000-044, Thermo).

18 Constructs: pCAGGS-Secreted-RBD-6X-His (gift from Florian Krammer, Mt. Sinai), pCEP4-myc-  
19 ACE2 (gift from Erik Procko; Addgene plasmid #141185), pLenti-hACE2-Puro (gift from Raffaele De  
20 Francesco; Addgene plasmid #155295), pCDNA3.1 ACE2 GFP (gift from Utpal Pajvani; Addgene  
21 plasmid #154962), pTwist-EF1alpha-nCoV-2019-S-2xStrep (gift from Nevan Krogan, UCSF), pHR  
22 mCherry plasmid (gift from Minhaj Sirajuddin, inSTEM, India) and second-generation lentiviral helper  
23 plasmid psPAX2 (gift from Didier Trono; Addgene plasmid #12260).

24 Antibodies: Anti-human transferrin receptor antibody was purified from mouse hybridoma and labelled  
25 using NHS-ester chemistry. Anti-Myc Mouse mAb from CST (9B11 clone; Cat# 2276) was used to  
26 label myc-ACE2. Alexa Fluor 568 labelled goat anti-mouse secondary (115-005-071; Jackson  
27 Laboratory) was used to detect labelled Myc. Monoclonal Anti-Strep Tag antibody (clone GT517; Cat#  
28 SAB2702215) from Sigma-Aldrich and Goat anti-Mouse HRP secondary antibody (115-035-208;  
29 Jackson Laboratory) was used to identify the C-term Strep-tag on the Spike protein in the Spike-  
30 pseudotyped virus lysate western blot. Anti-ACE2 pAb from Sigma (SAB3500977) was used to detect  
31 ACE2 and anti-tubulin pAb from (Sigma, T3526) was used to detect Tubulin on western blot.  
32 Polyclonal Anti-SARS Coronavirus 2 spike Glycoprotein (IgG, Rabbit; BEI Resources, Cat# NR-  
33 52947) was used to label the spike protein of SARS-CoV-2. Alexa Fluor 647 labelled donkey anti  
34 Rabbit (Invitrogen, A13573) was used to detect the primary antibody.

35 *Chemicals and reagents:*

36 BafilomycinA1 (B1793 Sigma), NH<sub>4</sub>Cl (A9434, Sigma), ML141 (4266, Tocris Bioscience),  
37 Chloroquine diphosphate (C6628, Sigma), Amiloride (A7410, Sigma), Atto 488 NHS Ester (41698;  
38 Sigma), TMR dextran (D1817, Thermo Scientific), Dextran 10kDa (D1860, Invitrogen), FITC Isomer-  
39 I (F1906, Molecular Probes), MTT (3-(4,5-Dimethylthiazol-2-yl)-2,5-diphenyltetrazolium bromide,  
40 M6494, Invitrogen), Hoechst (bisBenzimide trihydrochloride, H33342, Merck), Fugene 6 Transfection  
41 Reagent (E2692, Promega), Lipofectamine 3000 (Invitrogen), Lenti-X concentrator (631232, Takara  
42 Bio), 10X lysis buffer (9803, CST), Micro BCA™ Protein Assay Kit (23235; Thermo Scientific), PVDF

43 membrane (Immobilon-P, IPVH00010, Millipore), SuperSignal™ West Pico Chemiluminescent  
44 Substrate (34080, Thermo Scientific), TRI Reagent (AM9738, Invitrogen), RevertAid Reverse  
45 Transcriptase (EP0441, Thermo Scientific), Maxima SYBR-Green/ROX (K0221, Thermo Scientific),  
46 CellTiter- Glo Luminescent Cell Viability Assay (G7151, ProtoGen), Crystal violet (CO775, Sigma),  
47 VIRALDTECT-II multiplex real time PCR kit (G2MO20220, Genes2me) and Cell Mask Blue  
48 (H32720, Invitrogen). Hydroxychloroquine was provided by Mylan Laboratories.

#### 49 *Preparation of RBD:*

50 RBD purification was optimized using a protocol from Krammer's Laboratory <sup>1</sup>. The procedure is  
51 briefly described in S1A Fig. HEK-293T cells were seeded in T75 flasks, grown up to 60% confluency  
52 and transfected with secreted RBD construct using Lipofectamine 3000. Cells were incubated with  
53 serum-free media during the first 4 hours of transfection and then changed to medium containing 2%  
54 serum. Cells were grown under these conditions for 40-48 hours, after which the media with secreted  
55 RBD was collected. The same cells were further incubated with fresh 2% serum-containing media for  
56 another 40-48 hours and the media containing secreted RBD was collected at the end of the incubation  
57 time. The collected media was filtered using a 0.45-micron filter to remove cell debris and other  
58 contaminants. RBD was purified by immobilized metal ion affinity chromatography (IMAC) over a 5-  
59 mL HiTrap His column (GE Healthcare Life Sciences) with step elution using buffers containing 0-  
60 500mM Imidazole. RBD containing fractions was found to be eluted within the range of 150 - 300mM  
61 Imidazole-containing elution buffers (S1B Fig). These fractions containing RBD were pooled and  
62 concentrated using 3kDa filters (Amicon). The concentrated filtrate was loaded onto HiLoad® 16/600  
63 Superdex® 200 (GE Healthcare Life Sciences) gel filtration column and eluted using 1X PBS to  
64 separate RBD from serum albumin. The RBD-containing fractions were collected and concentrated  
65 using Centrivap vacuum concentrator or 3 kDa filters (Amicon). To label RBD using NHS ester  
66 chemistry, a 10-fold molar excess of Atto-488 NHS ester (Sigma) was incubated with RBD at pH 8.5  
67 for an hour at room temperature. Labelled protein was separated from free dye using gravity flow-based  
68 size exclusion chromatography (Thermo Scientific).

#### 69 *Preparation of Spike-pseudovirus particles and estimation of titre:*

70 Spike-pseudovirus particles were generated in LentiX-293T cells by co-transfecting the lentiviral helper  
71 plasmid psPAX, the C-term 2X-Strep-tagged Spike-encoding pTwist plasmid and a lentiviral pHR  
72 mCherry reporter plasmid encoding soluble mCherry protein under the control of SFFV promoter (S5A  
73 Fig). Transfection was carried out using Lipofectamine 3000. The expression of the Spike protein in  
74 the pseudovirus particles was verified by a western blot using the antibody against the C-terminal Strep-  
75 tag of Spike, which revealed bands corresponding to both the S2 fragment as well as the full-length  
76 protein (S5B Fig). Generation of bald pseudoparticles was carried out using same method except Spike-  
77 encoding plasmid was omitted from the cocktail. The supernatants were collected at least 3 times post-  
78 transfection between 48hours-72 hours. The viral supernatants were pooled and concentrated using the  
79 Lenti-X concentrator following manufacturer's protocol. The concentrated virus was resuspended in a  
80 small volume of Opti-MEM® (Gibco®), aliquoted and stored in -80°C. For determining titre, AGS cells  
81 were transduced at different dilutions of the pseudovirus preparation for 72hours. The number of  
82 mCherry positive cells/colonies in the entire area of a 96 well plate was counted, and titre was recorded  
83 as Transducing units per ml (TU/ml). All procedures were carried in containment in a BSL2 facility.

84 For evaluation of comparative infection by pseudoparticles expressing or lacking Spike protein, viral  
85 supernatants were prepared as described above and concentrated 80 times (80x). Both preparations were

86 serially diluted (5x, 2.5x, 1x, 0.5x and 0.25x) and added to cells. Post infection, cells were scored for  
87 expression of mCherry reporter (S5C Fig).

88 *q-PCR:*

89 Total RNA was isolated from different cell lines using TRI Reagent. 500ng of RNA was converted into  
90 cDNA using Revert Aid Superscript RT as per manufacturers' instructions. q-PCR for *ACE2* and  
91 *TMPRSS2* was performed using SYBR-Green kit. The expression levels were normalized to 18srRNA.  
92 Primers used is listed below:

| Primer name | Sequence 5'-3'         |
|-------------|------------------------|
| ACE2 FP     | ATCAGAGATCGGAAGAAGAAAA |
| ACE2 RP     | AAAAGGAGGTCTGAACATCA   |
| TMPRSS2 FP  | TAGTGTCCCCAGCCTACCTC   |
| TMPRSS2 RP  | GCACCAAGGGCACTGTCTAT   |
| 18s rRNA FP | GTAACCCGTTGAACCCCAT    |
| 18s rRNA RP | CCATCCAATCGGTAGTAGCG   |

93 *Western blotting:*

94 Virus-containing culture media, from 48-72h post-transfection, were pooled as mentioned in the above  
95 section. The medium was briefly centrifuged to remove cell debris and filtered using a 0.45µm filter.  
96 Filtered supernatant was overlaid on freshly prepared sucrose solution layer (50mM Tris-HCl, pH 7.4,  
97 100mM NaCl and 0.5mM EDTA; with 20% sucrose (w/w) at a 4:1 ratio (v/v) <sup>2</sup>) and centrifuged at  
98 15000 g at 4°C for 4h. The supernatant was carefully discarded and any remaining liquid was removed  
99 by gently inverting the tube onto a blotting paper. The pellet containing pseudovirus particles was gently  
100 resuspended in a minimum volume of PBS (pH 7.4) on ice. Pseudovirions were then lysed using 10X  
101 lysis buffer. Protein content was estimated using a Micro BCA™ Protein Assay Kit as per  
102 manufacturer's protocol. To validate the presence of spike protein, 20µg of this lysate was loaded onto  
103 a 10% SDS polyacrylamide gel, blotted on a PVDF membrane and probed with anti-Strep-tag primary  
104 antibody followed by HRP secondary antibody.

105 For ACE2 western blot, lysates were prepared using cell lysis buffer (50mM Tris-HCl (pH7.4), 150mM  
106 NaCl, 1mM PMSF, 1mM EDTA, protease inhibitor cocktail III, 1% Triton X-100, 1% sodium  
107 deoxycholate and 0.1% SDS). Protein content was estimated using Micro BCA™ Protein Assay Kit as  
108 per manufacturer's protocol. For detecting ACE2 levels, 40ug of total protein lysates were loaded onto  
109 a 10% SDS polyacrylamide gel, blotted on a PVDF membrane and probed with anti-ACE2 primary  
110 antibody followed by anti-rabbit HRP secondary antibody. Processed blots were stripped using a  
111 stripping buffer (1.5% glycine, 0.1% SDS and 1% Tween 20, pH 2.2) and re-probed with anti-tubulin  
112 primary antibody followed by anti-mouse HRP secondary antibody.

113 *RBD competition assay:*

114 An excess of 10<sup>14</sup> molecules of monomeric RBD and trimeric RBD was used for competing 1500  
115 pseudovirus particles. Pseudovirus particles are estimated to have 4.5\*10<sup>5</sup> binding sites, considering  
116 100 spike trimer or 300 spike monomers per virus particle, using the reported numbers for SARS-CoV  
117 <sup>3</sup>. The pseudovirus with excess protein mixtures were incubated at 37 °C for 15 minutes. Following this,  
118 the pseudoviruses mixtures were added to AGS cells for 8 hours. After this, the medium was removed,  
119 and cells were replenished with fresh medium (not containing RBD or pseudoviruses) for 48 hours and  
120 scored for mCherry reporter expression (S5E Fig).

121 *Cell viability assay:*

122 To check the toxicity of inhibitors in HEK-293Ts, cells were treated with specified concentrations of  
123 the inhibitors, similar to the format employed for transduction assays (except no pseudoviruses were  
124 added). At the end of the incubation period, cells were washed twice with serum-free medium and then  
125 incubated with MTT working solution (20µl of 5mg/ml MTT in serum-free medium + 80µl of growth  
126 medium) for 3 hours at 37°C. Following this, contents from all wells were removed completely and  
127 100µl of DMSO was added to each well. Complete dissolution of crystals in DMSO was ensured.  
128 Optical densities were then recorded at 570nm. Wells containing no cells were used for background  
129 correction. Values corresponding to cells treated with respective vehicle controls were considered as  
130 100%.

131 *Isolation and Titre determination of SARS-CoV-2:*

132 SARS-CoV-2 NR-52284 was obtained from BEI-Resources. The virus was propagated by infection in  
133 Vero cells. Infected cells were monitored daily for cytopathic effects (as a proxy for confirmation of  
134 SARS-CoV-2 replication) using phase contrast bright field microscopy. In addition, cell supernatants  
135 were collected every 24 hours for quantitative PCR with reverse transcription (qRT-PCR) for detection  
136 of viral E (envelope), N (nucleoprotein) and RdRp (RNA-dependent RNA polymerase) genes. For the  
137 propagation of virus, three passages were performed in Vero cells and viral titres were determined by  
138 plaque forming unit (pfu) assays using crystal violet agar method, as previously described<sup>4</sup>. Aliquots  
139 of SARS-CoV-2 in defined titres were stored at -80 °C.

140 *Viral infection evaluation assays:*

141 1. Cell viability assays

142 To assess the cell death caused by SARS-CoV-2 in infected cells, two different assays were used. The  
143 CellTiter Glo assay was performed following manufacturer's instructions. Briefly, CellTiter Glo  
144 reagent was added to wells at a 1:1 ratio of cell culture supernatant volume. Plates were incubated at  
145 room temperature for 10 minutes and luminescence was measured for 500ms using SpectraMax  
146 multimode reader. In the second method, infected wells were fixed with 4% para formaldehyde (PFA)  
147 for 1 hour at room temperature and stained with crystal violet (50ul of 0.5% of crystal violet to each  
148 well and incubated for 10-15 minutes). Plates were then washed 3-4 times with distilled water to remove  
149 excess crystal violet and dried. Dried plates were scanned, converted into grey scale images and pixel  
150 intensities of individual wells were quantified using a custom macro in Fiji.

151 2. Spike Immunostaining

152 Cells were fixed at indicated time points with 4% paraformaldehyde for 30 minutes and labelled with  
153 SARS-CoV-2 spike protein. 0.2% of triton-x-100 in 0.2% BSA was used to permeabilize the cells for  
154 10 minutes at RT followed by blocking in 1% BSA for 30 minutes. The cells were incubated for 1 hour  
155 at room temperature with Polyclonal Anti-SARS-CoV-2 Spike (1:2000) in blocking buffer. After three  
156 washes with wash buffer, the cells were incubated with Alexa Fluor 647 labelled donkey anti Rabbit  
157 (1:500) for 1 hour at room temperature in blocking buffer. After four additional washes, wash buffer  
158 supplemented with 5µM Hoechst and 2µg/ml of Cell Mask Blue was added to the cells for at least  
159 10 min followed by two washes before imaging. Confocal images were acquired at 40X magnification  
160 using the automated high content spinning disc imaging system, Phenix. Analysis was done using an  
161 automated pipeline set up with Harmony software from Perkin Elmer. The pipeline involved flat filed

162 correction, maximum projection and cell segmentation based on intensity and size of stained nuclei and  
163 cell cytoplasm marked by Hoescht and cell mask blue respectively. Mean intensities for Spike protein  
164 were calculated per cell and per well by the pipeline.

### 165 3. qRT-PCR

166 At indicated time points, cell supernatant and lysates were harvested for quantitative RT-PCR. Briefly,  
167 RNA isolation was done using TRIzol reagent following manufacturer's protocol using Genes2me  
168 qPCR kit to quantify SARS-CoV-2 replication. Each 20  $\mu$ L reaction mixture contained 10  $\mu$ L of  
169  $2 \times$  OneStep Master Mix, 1  $\mu$ L of Target primer/Probe mix, and 9  $\mu$ L of extracted RNA as template.  
170 Reaction conditions is as follows: 55°C for 10 min for reverse transcription, 95°C for 3 min for  
171 denaturation, followed by 40 cycles of 95°C for 15 s and 55°C for 60 s.

#### 172 *High content screening and automated imaging methodologies:*

173 For high-throughput endocytic and pH estimation assays, AGS cells were plated in optical bottom 96  
174 or 384 well plates at ~8000 or ~2000 cells/well and processed 16 hours after seeding. Experiments were  
175 conducted as detailed in the main text Methods using an automated plate washer and a robotic arm.

#### 176 *Image segmentation and feature extraction:*

177 The maximum projected images were corrected for the system background and uneven illumination.  
178 The background was measured from wells not containing cells and subtracted from the raw data. For  
179 each channel, the uneven excitation was estimated by averaging all the maximum projected images  
180 from a single day's experiment and applying a 2D Gaussian filter of 50. This filtering removed any  
181 potential low-intensity features. The average of all the pixel values was then normalised to 1 to generate  
182 an illumination profile image. All background-corrected images were divided by this estimated value  
183 of illumination.

184 For cell segmentation, the Hoechst-stained nuclei images were used to first identify cells using Otsu's  
185 method on log-scaled intensity images. Next, using Sobel edge detection on each endosome channel, a  
186 2D Gaussian filter of 20 pixels together with the Otsu methods allowed for the generation of a binary  
187 cell mask that contained most of the cell body of each cell. This allowed us to determine a field averaged  
188 background value by measuring the median intensity of the pixels outside of the area occupied by cells  
189 for all channels. Finally, individual endosomes within a cell were identified by using the endosome  
190 channels together with Otsu's method using the expected endosome sizes between 1-15 pixel diameters.  
191 Having identified cells and individual endosomes, their mean intensities in all channels, as well as their  
192 size and shape, were determined.

#### 193 *Synthesis of Niclosamide:*

194 Niclosamide was synthesized by coupling 5-chlorosalicylic acid with 2-chloro-4-nitroaniline in the  
195 presence of thionyl chloride.

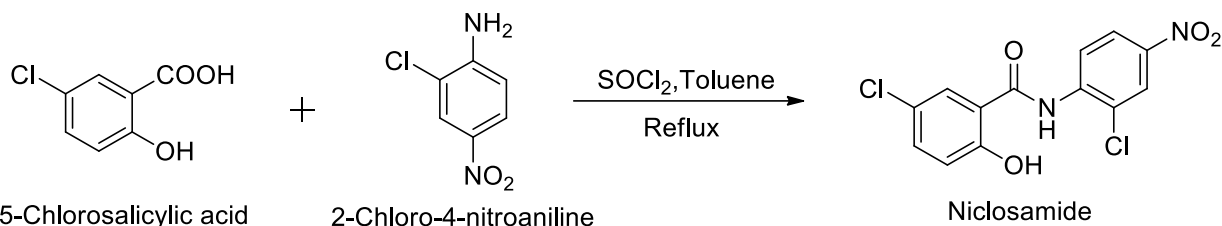

196

197 The 5-chlorosalicylic acid (1.72 g, 10 mmol) was suspended in 20 mL toluene. Thionyl chloride (160  
 198  $\mu\text{L}$ , 2.2 mmol) was added and the reaction mixture was stirred at 110 °C for two hours. To this mixture  
 199 was added 2-chloro-4-nitroaniline (1.14 g, 6.6 mmol) and the reaction was continued to stir at 110 °C  
 200 for another 6 hours. The reaction mixture was allowed to cool to room temperature and kept overnight  
 201 without disturbing. Niclosamide gets precipitated at the bottom of the RBF. The supernatant was  
 202 decanted, the precipitate was washed with an excess quantity of water and the product was dried to get  
 203 1.8 g (83% yield) of niclosamide. The product was characterized by comparison of the spectral data  
 204 with literature values <sup>5</sup>. Light yellow powder; m.p. 225-228 °C; HPLC: 98.9% purity; <sup>1</sup>H NMR (400  
 205 MHz, DMSO-*d*<sub>6</sub>)  $\delta$  12.48 (s, 1H, OH), 11.34 (s, 1H, NH), 8.80 (d, *J* = 9.2 Hz, 1H), 8.44 (d, *J* = 1.6 Hz,  
 206 1H), 8.30 (dd, *J* = 8.4, 2.0 Hz, 1H), 7.98 (d, *J* = 2.0 Hz, 1H), 7.55 (dd, *J* = 8.2, 2.0 Hz, 1H), 7.10 (d, *J*  
 207 = 8.8 Hz, 1H); <sup>13</sup>C NMR (100 MHz, DMSO-*d*<sub>6</sub>)  $\delta$  162.56, 155.18, 142.54, 141.17, 134.03, 130.07,  
 208 124.78, 123.90, 123.78, 122.37, 120.70, 119.41, 119.16; IR ( $\nu_{\text{max}}$ ): 3488, 2921, 1679, 1607, 1348, 1195,  
 209 1124, 901  $\text{cm}^{-1}$ ; ESI-MS: *m/z* 325.05 [M-H]<sup>-</sup>.

210 Spectral scans of Niclosamide:

211 <sup>1</sup>H NMR:

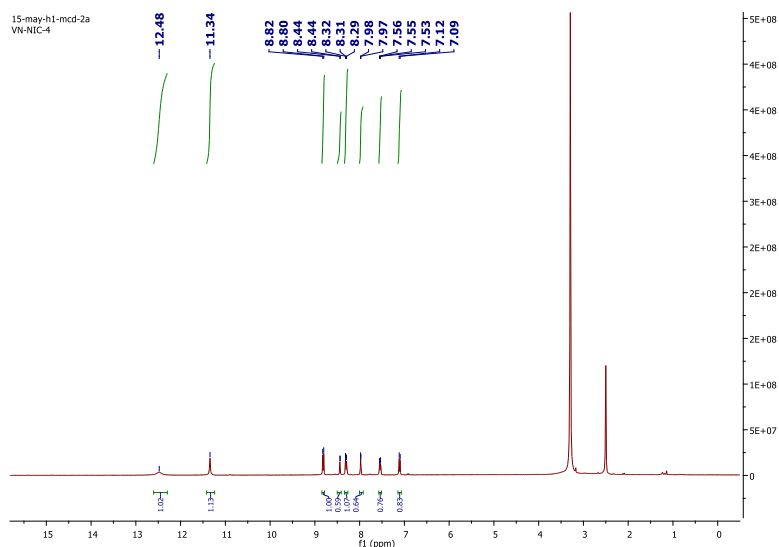

212

213 <sup>13</sup>C NMR:



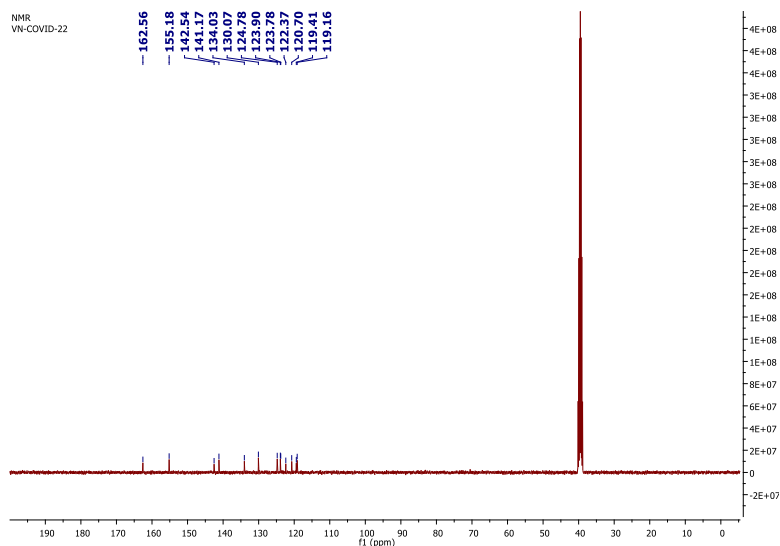

214

215 *AN96, a stable analog of GBF1 inhibitor, LG186:*

216 AN96(4-(2-(3,4,5-trimethoxybenzylidene)hydrazineyl)-5,6,7,8,9,10-  
 217 hexahydrocycloocta[4,5]thieno[2,3-d]pyrimidine) was synthesized to create a more stable analog of  
 218 LG186<sup>6,7</sup>, and this will be detailed elsewhere (Godbole et al., Manuscript in preparation).

219

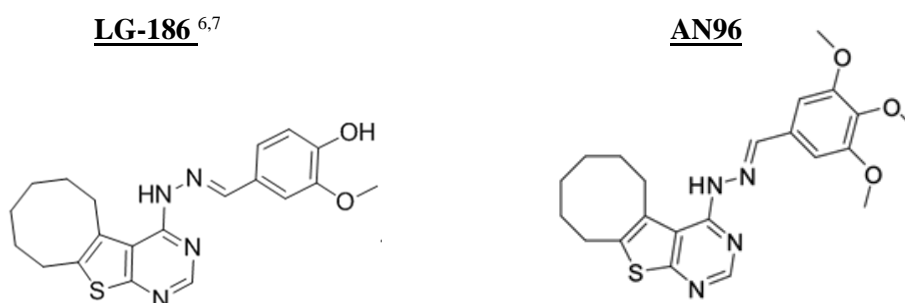

220

221 *Extraction of Esomeprazole and Pantoprazole:*

222 The commercially available tablets were dissolved in the aqueous phase and extracted with ethyl acetate  
 223 (3x50mL). The organic layer was passed through anhydrous sodium sulphate, and the solvent was  
 224 evaporated using Rotavapor. Recrystallization with hexane gave the pure compound in powder form.  
 225 The purity of the drug has been confirmed using <sup>1</sup>H-NMR spectroscopy. Molecular weight of  
 226 Esomeprazole and Pantoprazole is 345.4 g/mol and 383.4 g/mol, respectively.

227

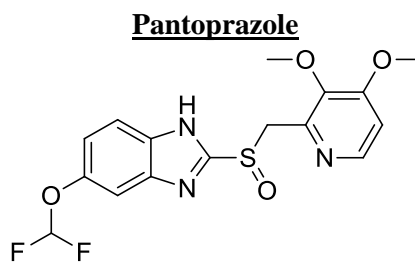

228

229 <sup>1</sup>H NMR (600 MHz, DMSO-d<sub>6</sub>), δ (ppm) = 3.89 (s, 6H), 4.32 (d, J=12.9 Hz, 2H), 6.74 (dd, J=2.4 Hz,  
 230 2H), 7.018 (s, 1H), 7.07 (d, J=5.52 Hz, 2H), 7.24 (d, J=2.34 Hz, 1H), 7.45 (d, J=8.58 Hz, 1H).

231  $^{13}\text{C}$  NMR (150 MHz, DMSO- $d_6$ ),  $\delta$  (ppm) = 56.36, 56.41, 61.42, 107.91, 108.32, 111.73, 116.26,  
232 118.11, 119.65, 144.72, 144.80, 145.03, 146.27, 147.59.

233

**Esomeprazole**

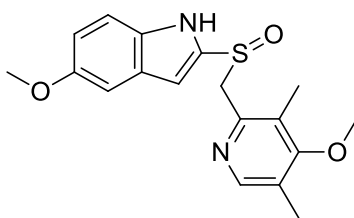

234

235  $^1\text{H}$  NMR (600 MHz, DMSO- $d_6$ ),  $\delta$  (ppm) = 2.21 (s, 6H), 3.68 (s, 6H), 4.40 (s, 2H), 7.026 (s, 1H), 7.37  
236 (d,  $J$  = 8.8 Hz, 1H), 8.25 (s, 1H).

237



238 **References:**

- 239 1. Stadlbauer, D. *et al.* SARS-CoV-2 Seroconversion in Humans: A Detailed Protocol for a  
240 Serological Assay, Antigen Production, and Test Setup. *Curr. Protoc. Microbiol.* **57**, (2020).
- 241 2. Jiang, W. *et al.* An optimized method for high-titer lentivirus preparations without  
242 ultracentrifugation. doi:10.1038/srep13875.
- 243 3. Bar-On, Y. M., Flamholz, A., Phillips, R. & Milo, R. SARS-CoV-2 (COVID-19) by the  
244 numbers. *Elife* **9**, (2020).
- 245 4. Mendoza, E. J., Manguiat, K., Wood, H. & Drebot, M. Two Detailed Plaque Assay Protocols  
246 for the Quantification of Infectious SARS-CoV-2. *Curr. Protoc. Microbiol.* **57**, 105 (2020).
- 247 5. Al-Hadiya, B. M. H. Niclosamide: Comprehensive Profile. *Profiles of Drug Substances,*  
248 *Excipients and Related Methodology* vol. 32 67–96 (2005).
- 249 6. Boal, F. *et al.* LG186: An Inhibitor of GBF1 Function that Causes Golgi Disassembly in Human  
250 and Canine Cells. *Traffic* **11**, 1537–1551 (2010).
- 251 7. Thottacherry, J. J. *et al.* Mechanochemical feedback control of dynamin independent  
252 endocytosis modulates membrane tension in adherent cells. *Nat. Commun.* **9**, 1–14 (2018).

253
